# Supplementary material
Source: HighWire-hosted journal article supplement (https://www.canjsurg.ca/highwire/filestream/96829/field_highwire_adjunct_files/0/cjs-013517-1-at.pdf)
Supplement: cjs-013517-1-at.pdf [file cjs-013517-1-at.pdf]

**Appendix 1** to DeGirolamo K, D'Souza K, Apte S, et al. A day in the life of emergency general surgery in Canada: a multicentre observational study. *Can J Surg* 2018.

DOI: 10.1503/cjs.013517

Copyright © 2018 The Author(s) or their employer(s).

To receive this resource in an accessible format, please contact us at [cmajgroup@cmaj.ca](mailto:cmajgroup@cmaj.ca).

*Online appendices are unedited and posted as supplied by the authors.*

## **Appendix 1 – A day in the life of Emergency General Surgery (EGS) data collection form**

*Online appendices are unedited and posted as supplied by the authors.*

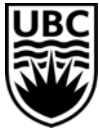

**Project Principal Investigator**  
 S. Morad Hameed, MD MPH FRCSC  
 Vancouver General Hospital – Trauma Services,  
 855 W 12th Avenue, Vancouver, BC, V5Z 1M9  
 Fax: (604) 875-5358

**For Final Reviewer ONLY:** Please check off your institution, ensure no duplicate forms for patients, fill out any missing fields if possible and REMEMBER to redact patient identifiers prior to faxing to Dr. Hameed at (604) 875-5348.

- Vancouver General  
  Royal Columbian  
  Eagle Ridge  
  Victoria Gen.  
  Foothills  
  Red Deer Regional  
 University of Alberta  
  St. Boniface  
  Health Sciences Centre  
  Ottawa  
  Sunnybrook  
  Toronto General  
 St. Michael's  
  Brampton General  
  Etobicoke General  
  McGill University Health Centre  
 QEII – Halifax Infirmary  
  SJHH

|                             |                                       |                                           |
|-----------------------------|---------------------------------------|-------------------------------------------|
| Age: _____                  | Past Medical History/ Co-Morbidities: | Admitting Diagnosis:                      |
| Gender: Male                | Diabetes Mellitus                     | Appendicitis                              |
| Female                      | Smoking                               | Cholecystitis                             |
| Other: _____                | COPD                                  | Intestinal Obstruction                    |
| Days since admission: _____ | Myocardial Infarction/ Angina         | Mesenteric Ischemia                       |
|                             | TIA/ Stroke                           | Abdominal Pain                            |
|                             | Congestive Heart Failure              | Skin and Soft Tissue Infections           |
|                             | Previous Abdominal Surgery            | Other: _____                              |
|                             | Previous VTE or PE                    | Final Diagnosis (if different from above) |
|                             | Other: _____                          | _____                                     |

Depending on the management of the patient, you may fill both or just one of the sections. Please choose appropriately.

**NON-OPERATIVE**

**OPERATIVE**

For the checkboxes that below are ticked, please provide relevant details regarding management

Pain Medications or Other Medications \_\_\_\_\_

Antibiotics \_\_\_\_\_

Fluids \_\_\_\_\_

Total Parental Nutrition Ordered \_\_\_\_\_

Radiological Interventions \_\_\_\_\_

Procedure: \_\_\_\_\_

Date of Procedure: \_\_\_/\_\_\_/\_\_\_

Planned Procedure: \_\_\_/\_\_\_/\_\_\_

Operative Management of Patient:

Open Abdominal Surgery \_\_\_\_\_

Laparoscopic Surgery \_\_\_\_\_

Laparoscopic to Open Conversion \_\_\_\_\_

Intraoperative Complications (if yes, list below) \_\_\_\_\_

Post-Operative Complications (if yes, list below) \_\_\_\_\_

Did/ Will this patient be transferred to the Intensive Care Unit during this hospital visit Yes No

If yes, please answer the following if applicable:

Patient is or will be mechanically ventilated Yes No

No. of days patient has been in the ICU: \_\_\_\_\_

Discharge Information:

N/A

To Home

Which other medical staff were asked to consult on this patient's care (Check more than one if applicable)

General Internal Medicine \_\_\_\_\_

Gastroenterology \_\_\_\_\_

Oncology \_\_\_\_\_

Urology \_\_\_\_\_

Plastics and Reconstructive Surgery \_\_\_\_\_

Other: \_\_\_\_\_

**Appendix 1** to DeGirolamo K, D'Souza K, Apte S, et al. A day in the life of emergency general surgery in Canada: a multicentre observational study. *Can J Surg* 2018.

DOI: 10.1503/cjs.013517

*Online appendices are unedited and posted as supplied by the authors.*

**Appendix 2** – A day in the life of Emergency General Surgery (EGS) data summary form

Online appendices are unedited and posted as supplied by the authors.

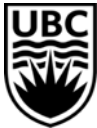

**Project Principal Investigator**  
S. Morad Hameed, MD MPH FRCS  
Vancouver General Hospital – Trauma Services,  
855 W 12th Avenue, Vancouver, BC, V5Z 1M9  
Fax: (604) 875-5358

**For Final Reviewer ONLY:** Please check off your institution, ensure no duplicate forms for patients, fill out any missing fields if possible and REMEMBER to redact patient identifiers prior to faxing to Dr. Hameed at (604) 875-5348.

- Vancouver General  Royal Columbian  Eagle Ridge  Victoria Gen.  Foothills  Red Deer Regional  
 University of Alberta  St. Boniface  Health Sciences Centre  Ottawa  Sunnybrook  Toronto General  
 St. Michael's  Brampton General  Etobicoke General  McGill University Health Centre  
 QEII – Halifax Infirmary  SJHH

### SUMMARY DATA COLLECTION FORM

Total Number of Consults Seen \_\_\_\_\_  
Total Number of Patients Admitted \_\_\_\_\_  
Total Number of Patients under the Care of the Acute Care Surgery (ACS) Service \_\_\_\_\_  
Total Number of ICU patients the ACS Service is following \_\_\_\_\_  
Total Number of Open Abdomen Patients \_\_\_\_\_  
Total Number of patients the ACS Service is following as Consult ONLY (i.e. Not Admitted under the ACS Service): \_\_\_\_\_

#### OPERATIVE DATA:

Total Number of Laparoscopic ORs \_\_\_\_\_  
Total Number of Open ORs \_\_\_\_\_  
Total Procedures Completed \_\_\_\_\_  
Total Intraoperative Complications \_\_\_\_\_

#### NON-OPERATIVE DATA:

Total Number of Patients Admitted with Plans for Non Operative Management \_\_\_\_\_  
Total Number of Non Operative Patients admitted for Antibiotic Treatment \_\_\_\_\_

#### CASE MIX DATA:

Total Appendicitis Cases \_\_\_\_\_  
Total Cholecystitis Cases \_\_\_\_\_  
Total Pancreatitis Cases \_\_\_\_\_  
Total Intestinal Obstruction Cases \_\_\_\_\_  
Total Upper GI Bleed Cases \_\_\_\_\_  
Total Lower GI Bleed Cases \_\_\_\_\_  
Total Mesenteric Ischemia Cases \_\_\_\_\_
